# Supplementary material for: Identification of a broad-spectrum flavivirus inhibitor targeting NS2A, a previously unidentified target
Source: Research Square preprint supplement (doi:10.21203/rs.3.rs-5979312/v1), 2025-02-21
Supplement: Supplementary file 1 [file 2ec10393751fb428e9f2b06a.docx]

**Identification of a broad-spectrum flavivirus inhibitor targeting NS2A, a previously unidentified target**

Doortje Borrenberghs1, Kitti Wing Ki Chan2, Sven Van Brandt 3, Steffen Jaensch3, Milly Ming Ju Choy2, Peggy Geluykens4, Asmae El Bouayadi4, Dax Lauwers4, Pradeep Bist2, Bart Stoops3,Jeroen Van de Ven3, Peter Vermeulen3, Sarah Megens3, Daniëlle Peeters3, Suzanne J. F. Kaptein5, Johan Neyts5, Subhash G Vasudevan2,6, Anil Koul1, and Olivia Goethals1,*

1. Communicable diseases, Johnson & Johnson, Turnhoutseweg 30, 2340, Beerse, Belgium.
2. Center of Global Health Discovery - Flavivirus, Program in Emerging Infectious Diseases, Duke-NUS Medical School, 8 college road, Singapore 169857.
3. Janssen Research and development, Johnson & Johnson, Turnhoutseweg 30, 2340, Beerse, Belgium;
4. Discovery, Charles River Beerse, Turnhoutseweg 30, 2340, Beerse, Belgium.
5. KU Leuven Department of Microbiology, Immunology and Transplantation, Rega Institute for Medical Research, Virology, Antiviral Drug & Vaccine Research Group, Leuven, Belgium.
6. Institute of Biomedicine and Glycomics, Griffith University, Queensland, Australia.

*Correspondence: [Ogoethal@its.jnj.com](mailto:Ogoethal@its.jnj.com).

Material and Methods

**Additional cell lines and viruses – antiviral assays**

The HeLa cell line (Cervical epithelial, human, CCL-2™) was obtained from ATCC (Manassas, VA, USA) and was cultured for infection experiments in RPMI-1640 medium supplemented with 10% heat-inactivated FBS, 25 mM Hepes, 100 mM L-glutamine and 0.02 mg/mL gentamycin. In the medium for the antiviral assay, the 10% heat-inactivated FBS is replaced by 2% heat-inactivated FBS. HepG2.117 cells were kindly provided by Prof. M. Nassal, University Hospital Freiburg, Freiburg, Germany 1. HepG2.117 cells were cultured in DMEM supplemented with 10% FBS, 2 mM L-glutamine, 0.02 mg/mL gentamicin, 0.080 mg/mL hygromycin (Roche), 0.500 mg/mL geneticin (G418; Gibco), and 100 ng/mL doxycycline (Sigma). HepG2.117 is an inducible hepatitis B virus (HBV)-replication cell line 1. It was established by introduction of a tetracycline (Tet)-responsive element (TRE)-controlled HBV genome (Genotype D, Subtype ayw) expression vector (pTRE-HBVT) into a HepG2 cell line that stably expresses a Tet responsive trans-activator (tTA). HBV pregenomic RNA is transcribed under the control of the TRE-controlled minimal cytomegalovirus (CMV) promotor upon doxycycline removal from the culture medium, leading to capsid assembly and DNA synthesis. Huh7-Luc cells (Huh7 human hepatoma cells that are stably transfected with a selectable self-replicating subgenomic hepatitis C virus [HCV] Genotype 1b [Clone ET] RNA sequence harboring a luciferase [Luc] reporter gene) and Huh-7-CMV-Luc (Huh-7 cells containing a CMV major immediate early promoter – Luc construct) were obtained from Heidelberg University Hospital (Heidelberg, Germany) 2. Both cell lines were cultured in DMEM supplemented with 10% heat-inactivated FBS, 0.02 mg/mL gentamycin, 2 mM L-glutamine, and 0.25 mg/mL G418. The same medium was used in the antiviral assay. LLC-MK2 (Monkey kidney cells, CCL7) obtained from ATCC, were grown in DMEM supplemented with 10% heat-inactivated FBS, 2 mL L-glutamine, 1 mM nonessential amino acids, penicillin (100 IU/mL), streptomycin (0.100 mg/mL), and 1 mM sodium pyruvate. All cells were incubated at 37°C in the presence of 5% CO2. Recombinant human rgRSV224[63](https://www.nature.com/articles/s41467-017-00170-x#ref-CR63) was licensed from the National Institutes of Health (Bethesda, MD, USA) and propagated in HeLa cells 3. CHIKV/S27 was obtained through the ECACC (Cat. No: 0006254v). Recombinant hMPV A2 -GFP (CAN97-83) strain (M121-; ViraTree; USA), harboring an eGFP reporter in their genome was licensed from the National Institutes of Infectious Diseases (Tokyo, Japan) 4. INF A/Taiwan/1/1986 (H1N1, TW) or INF B/Singapore/222/1979 (Yamagata lineage) are available in-house.

**Antiviral assays**

The antiviral activity was determined against other DNA and RNA viruses. The RSV antiviral assay was described in Roymans et al. 5. In brief, Hela cells (3,000 cells/well) are infected with RSV-eGFP at MOI 1 and incubated at 37°C for 3 days in 384-well black microtiter plates with a serial dilution of the compound. The produced eGFP fluorescence is measured using the Envision (PerkinElmer). The level of eGFP expression in infected cells correlates with the level of viral replication. In parallel, possible effects on the metabolic state of the cells (e.g. cytocidal or cytostatic) are determined using an ATP-based bioluminescent readout. The antiviral activity against CHIKV/S27 (Togaviridae) was measured with a CPE inhibition assay using ATPLite (PerkinElmer). This assay readout is based on the bioluminescent measurement of adenosine triphosphate (ATP) in metabolically active cells. Briefly, Huh7 cells (8,000 cells/well, CHIKV) were seeded in 384-well blackview plates (Costar) containing serially diluted test compound in cell culture medium (DMEM supplemented with 2% FBS) and were infected with CHIKV/S27 at a MOI of 0.25. Plates were incubated at 37°C and 5% CO2 for 2 days until the viral CPE in the virus control wells reached ~100%/. Then, ATPLite was added to all wells to assess the viability of the cells and thus the preventive effect of the antiviral test compound on CPE. Luminescence was measured using a Viewlux (PerkinElmer). In parallel, cytotoxicity was assessed in non-infected Huh7 cells using the same ATP-based bioluminescent readout. The antiviral activity against Influenza (INF) A and INF B (Orthomyxoviridae) was determined using the neuraminidase activity. A549 cells (6,000 cells/well) were infected with the INF A/Taiwan/1/1986 (H1N1, TW) or INF B/Singapore/222/1979 (Yamagata lineage) at an MOI 0.05 in 384 well plates. Plates were incubated at 37°C and viral infection is measured after 2 days. The neuramidase activity is determined on the cells using 2’-(4-Methylumbelliferyl)-a-D-N-acetylneuraminic acid at 25 µM as a fluorescent substrate. Viral neuramidase converts the substrate into a fluorometric product which is directly proportional to the neuraminidase activity of the viral sample. The readout is done using a fluorescence microplate reader (Fluoroskan™, Thermo Scientific™). In parallel, the toxicity of the compounds is tested in A549 cells and is measured using the same ATP-based bioluminescent readout as for CHIKV. 20,000 HepG2.117 cells per well were plated into 96-well plates 1 day before compound addition. During the antiviral testing, cells were cultured in DMEM medium with 1% nonessential amino acid solution and 1% L-glutamine in the absence of doxycycline and presence of 2% FBS. At the end of the drug treatment, the supernatant was removed, and intracellular total DNA was extracted. Briefly, 100 µL of a 0.33% NP-40 solution was added per well, the plate was incubated at 4°C for 5 minutes and spun at 1,500 revolutions per minute (rpm) for 5 minutes to remove cell debris. Of the lysate, 35 µL was added to 65 µL QuickExtract DNA Extraction solution 1.0 (Epicentre) in a 96-well PCR plate and the plate was incubated for 6 minutes at 65°C and 2 minutes at 98°C in a PCR machine. Of the extracted total DNA, 10 µL was used for the quantification of HBV DNA in a RT-qPCR assay. The Δ cycle threshold (Ct) method was used to calculate 50% effective concentration (EC50) values. Toxicity was evaluated on HepG2 117 cells (20,000 cells/well) seeded in 96-well culture plates (Nunc) in RPMI-1640 medium with 2% L-glutamine in the presence of 2% FBS containing serially diluted test compound in cell culture medium and were incubated for 4 days. Cytotoxicity is measured using the ATP-based bioluminescent readout. The antiviral activity against HCV (Flaviviridae) was tested in an HCV replicon-containing cell culture system. In brief, Huh7-Luc replicon-containing cells were seeded in 384-well plates (2,500 cells/well) and incubated for 3 days with a concentration range of serially diluted compound in cell culture medium without G418. HCV replicon RNA replication was determined by means of measuring the firefly luciferase reporter gene expression using the SteadyLite Plus assay kit (PerkinElmer) and luminescent measurement using a ViewLux reader (PerkinElmer). A toxicity assay was performed using the Huh7-CMV-Luc cells (containing an hCMV-MIEP-Luc construct). Cells were seeded in 384-well culture plates (2,500 cells/well) in cell culture medium without G418 and incubated for 3 days at 37°C in the presence or absence of the compound. Luciferase activity was quantified using the SteadyLite plus assay kit and luminescent measurement using a ViewLux reader. LLC-MK2 cells (6,000 cells/well) are infected with hMPV A2 -GFP (CAN97-83) at MOI 0.1 in Opti-MEM reduced serum medium without FBS, containing 0.5 µg/mL trypsin and incubated at 37°C with compound for 3 days. The produced eGFP fluorescence is measured using the Acumen. The level of eGFP expression in infected cells correlates with the level of viral replication. In parallel, possible effects on the metabolic state of the cells (e.g. cytocidal or cytostatic) are determined using an ATP-based bioluminescent readout.

Supplementary Figures:


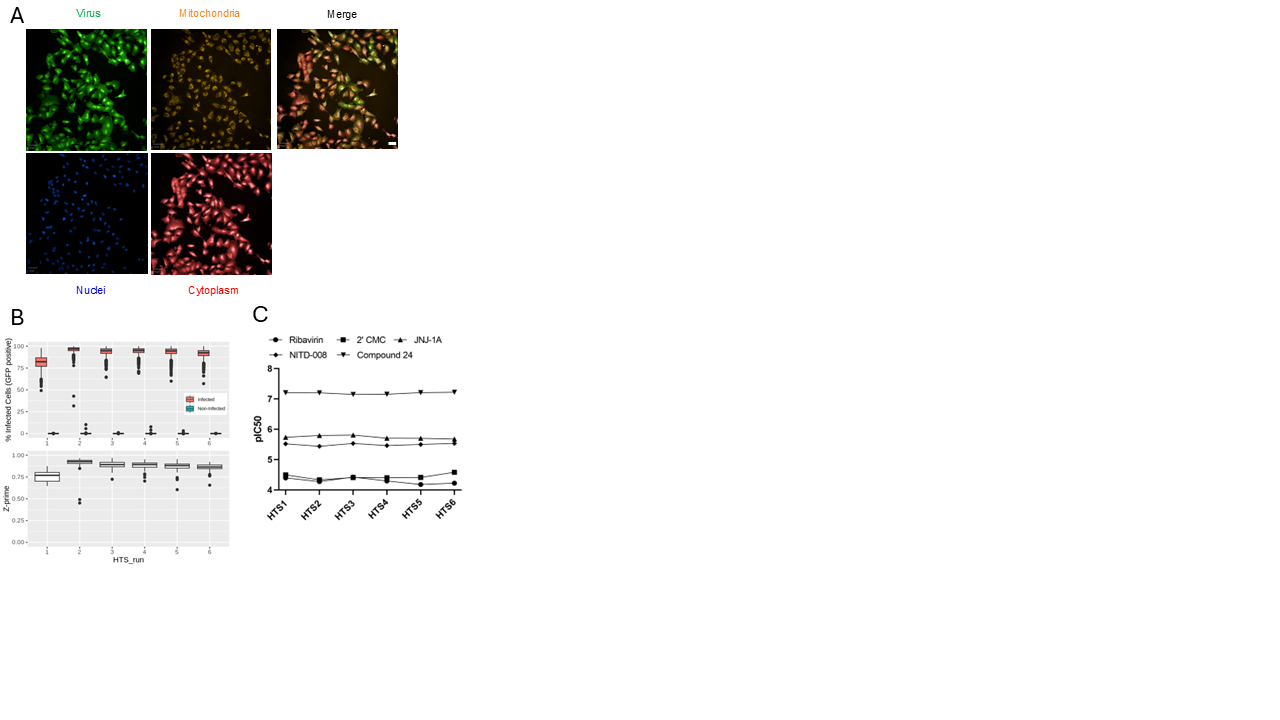


**Supplementary Figure 1: High-content imaging DENV-2/16681-GFP antiviral assay in A549 cells. a** Representative image of DENV-2/16681-GFP infected A549 cells. 10 x magnification images from CV7000 Yokagawa showing eGFP signal coming from the DENV-2/16681-GFP infection (eGFP, green), Hoechst staining (nuclei, blue), MitoTracker orange staining (mitochondria, Orange) and Cell-MaskTM Deep red staining (cytoplasm and nucleus, Red). Scale bar: 50 µM. **b** Reproducibility and robustness of the assay. Percentage of infection (top) and Z-prime (bottom) for each HTS run. The complete primary screen was divided into 6 different runs. Z’ factors (>0.7 for most plates) were consistent across the different runs. **c** pIC50 values (negative log of the 50% inhibitory concentration) for 5 standard used reference compounds (Ribavirin, 2’CMC, JNJ-1A, NITD-008 and Compound 24). The pIC50 value for each reference compound is determined each HTS run. The potency of the reference compounds across the different assay runs was reproducible, demonstrating assay robustness.


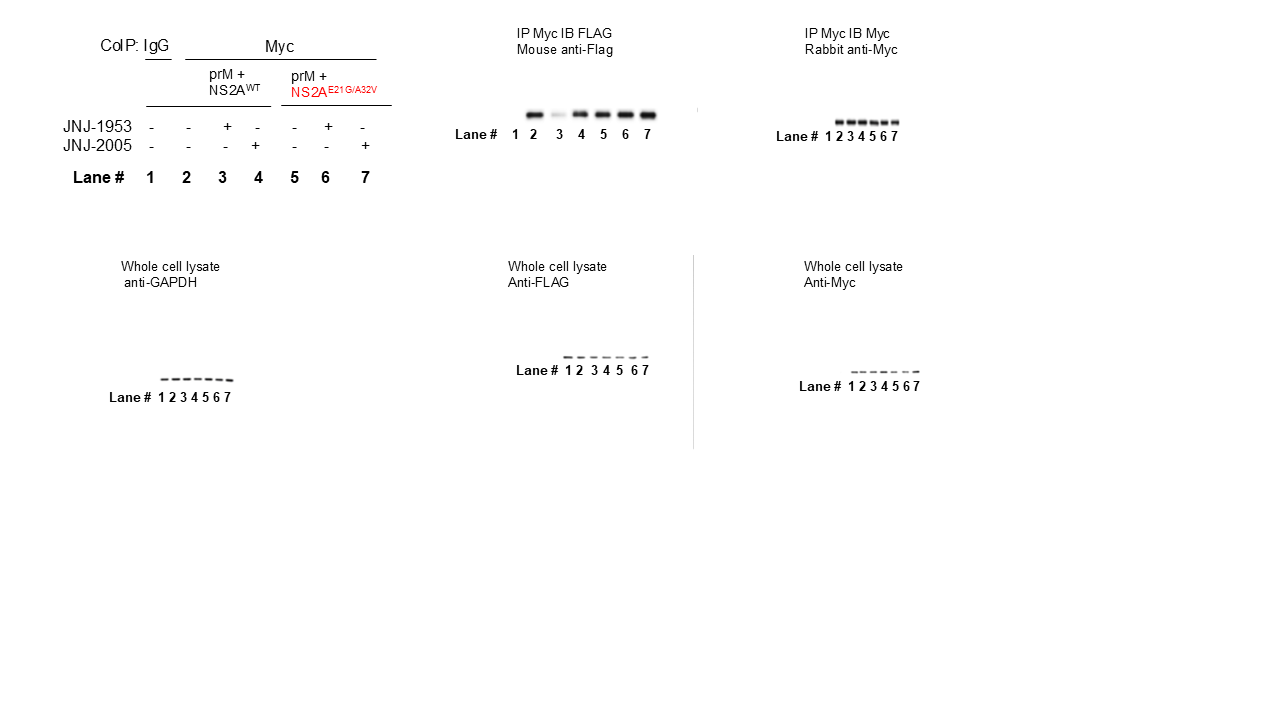


**Supplementary Figure 2: Uncropped Western blot images represented in Fig. 5B.**

**Supplementary Table 1: Activity of JNJ-3644 different enantiomers against DENV-2/16681 in Vero-GFP cells​**

|  | EC50 [µM] | CC50 [µM] | SI |
| --- | --- | --- | --- |
| JNJ-3644 ​ | 0.18 0.2 | 13 6.4 | 72 |
| Isomer 1 | 0.94 0.023 | 4.2 0.74 | 4 |
| Isomer 2 | 0.85 0.011 | 4.9 1.6 | 6 |
| Isomer 3 | 1.8 0.48 | 13 0.76 | 7 |
| Isomer 4 | 1.0 0.13 | 6.8 0.85 | 7 |
| Isomer 5 | 1.0 0.18 | 4.5 0.16 | 5 |
| Isomer 6 | 1.9 0.05 | 11 1.3 | 6 |
| Isomer 7 | 4.6 1.6 | 21.6 1.5 | 5 |

Antiviral data for DENV-2 (Vero-eGFP) represent mean values from at least 2 independent experiments. EC50 50% effective concentration. CC50 50% cytotoxic concentration. Selectivity index (SI): ratio CC50/EC50

Supplementary Table 2: Antiviral activity of JNJ-3644 against other RNA and DNA viruses

| Cells | Virus | EC50 [µM] | CC50 [µM] | SI |
| --- | --- | --- | --- | --- |
| HeLa | RSV | 16 2.8 | 20 | 1 |
| Huh7 | CHIKV | >50 | 8.4 |  |
| Huh7-Luc | HCV | 7.9 0.74 | 19 0.09 | 2 |
| LLC-MK2 | hMPV | 6.9 4.4 | 9.7 1.5 | 1 |
| A549 | FLU – SG | 2.1 1.1 | 5.9 | 3 |
| A549 | FLU – TW | 3.1 1.4 | 5.9 | 1 |
| HepG2.117 | HBV | >50 | 20 2.7 |  |

Antiviral data represent mean values from two independently performed experiments. EC50 50% effective concentration. CC50 50% cytotoxic concentration. Selectivity index (SI): ratio CC50/EC50. RSV: respiratory syncytial virus. CHIKV: Chikungunya virus. HCV: Hepatitis C Virus. hMPV: human metapneumovirus. Flu: Influenza virus. SG: Singapore. TW: Taiwan. HBV: Hepatitis B virus.

Supplementary Table 3: Percentage of allele frequency of the mutations developed in the DENV-2/16681 strain at passage 18 and 28 following an *in vitro* resistance experiment using JNJ-1953

| **Mutation in**  **DENV-2/16681** | **Passage 18** | **Passage 28** | **Control** |
| --- | --- | --- | --- |
| E_K122E/I | 0.54 | 0.25 | 0.05 |
| E_T454I | 0.37 | 0.21 | 0.01 |
| M_V99A | 0.21 | 0.24 | 0.01 |
| NS1_G235E | 0.23 | 0.23 | 0.01 |
| NS2A_F18L | 0.52 | 0.32 | 0.01 |
| NS2A_E21G | 0.34 | 0.28 | 0.00 |
| NS2A_A32V | 0.14 | 0.40 | 0.00 |
| NS4A_E9G | 0 | 0.55 | 0.00 |
| NS4B_T179I | 0.26 | 0.84 | 0.01 |
| NS5_K46R | 0.03 | 0.56 | 0.01 |

The data represents one individual IVRS experiments. In total three independent IVRS experiments were executed with JNJ-3644 and JNJ1953, but only NS2A mutations were common in the three IVRS experiments, all other mutations were not confirmed in other IVRS experiments.

Supplementary Table 4: Natural occurrence of the NS2A mutation residues in clinical isolates

| **Compares to**  **DENV-2/16681 6** | **Frequency mutant (%)** | | | | | | | | |
| --- | --- | --- | --- | --- | --- | --- | --- | --- | --- |
| DENV-2 | DENV-1 | DENV-3 | DENV-4 | JEV | WNV | YFV | ZIKV |
| F18L | 0.65% | 1.4% | 100% | 0.1% | 0% | 0% | 0% | 0% |
| E21G | 0% | 0% | 0% | 0% | 0% | 0% | 0% | 0% |
| A32V | 0.2% | 1.6% | 0% | 0% | 0% | 0% | 0% | 0% |

The natural occurrence of the mutations was retrieved from the Bacterial and Viral bioinformatics Research center (BV-BRC) database (2024).

Supplementary Table 5: Antiviral activity of JNJ-3644 and JNJ-4840 against WT and NS2A mutant viruses

| **pFK-sgDVs-R2A​** | **JNJ-3644​** | | **JNJ-4840​** | |
| --- | --- | --- | --- | --- |
| Cells​ | EC 50 [µM]​ | FC​ | EC 50 [µM]​ | FC​ |
| WT​ | 0.98​ | ​ | 0.23​ | ​ |
| E21G | 5.3​ | 5​ | 5.4​ | 24​ |
| A32V | 3.4​ | 3​ | 3.1​ | 14​ |
| F18L | 3.9​ | 4​ | 3.8​ | 17​ |
| E21G/A32V​ | 4.2​ | 4​ | 5.1​ | 23​ |
| E21G/A32V/F18L​ | 4.4​ | 5​ | 5.8​ | 26​ |

Antiviral data represent mean values from two independently performed experiments. EC50 50% effective concentration. FC: Fold change compared to WT.

1 Sun, D. & Nassal, M. Stable HepG2- and Huh7-based human hepatoma cell lines for efficient regulated expression of infectious hepatitis B virus. *J Hepatol* **45**, 636-645, doi:10.1016/j.jhep.2006.05.019 (2006).

2 Lohmann, V. *et al.* Replication of subgenomic hepatitis C virus RNAs in a hepatoma cell line. *Science* **285**, 110-113, doi:10.1126/science.285.5424.110 (1999).

3 Hallak, L. K., Spillmann, D., Collins, P. L. & Peeples, M. E. Glycosaminoglycan sulfation requirements for respiratory syncytial virus infection. *J Virol* **74**, 10508-10513, doi:10.1128/jvi.74.22.10508-10513.2000 (2000).

4 Shirogane, Y. *et al.* Efficient multiplication of human metapneumovirus in Vero cells expressing the transmembrane serine protease TMPRSS2. *J Virol* **82**, 8942-8946, doi:10.1128/JVI.00676-08 (2008).

5 Roymans, D. *et al.* Therapeutic efficacy of a respiratory syncytial virus fusion inhibitor. *Nat Commun* **8**, 167, doi:10.1038/s41467-017-00170-x (2017).

6 Kinney, R. M. *et al.* Construction of infectious cDNA clones for dengue 2 virus: strain 16681 and its attenuated vaccine derivative, strain PDK-53. *Virology* **230**, 300-308, doi:10.1006/viro.1997.8500 (1997).
